# Supplementary material for: Causal Relationships between Air Pollutant Exposure and Bone Mineral Density and the Risk of Bone Fractures: Evidence from a Two-Stage Mendelian Randomization Analysis
Source: MDPI journal article supplement (doi:10.3390/toxics12010027), 2023-12-30
Supplement: s1 [file s1]

## *Supplementary Materials*

**Supplementary Table S1 SNPs associated with single air pollutants (used as IVs in MR analysis)**

| SNPs        | Chr | Position  | Effect allele | Other allele | EAF   | Effect | SE    | P-value  | N      | Phenotype | F-statistic | Variance explained (%) | Note                                                |
|-------------|-----|-----------|---------------|--------------|-------|--------|-------|----------|--------|-----------|-------------|------------------------|-----------------------------------------------------|
| rs6749467   | 2   | 343517    | A             | G            | 0.466 | -0.012 | 0.002 | 1.40E-08 | 423796 | PM2.5     | 32.228      | 0.008                  | Removed from PM2.5/eBMD analysis                    |
| rs1372504   | 5   | 103749428 | A             | G            | 0.374 | 0.012  | 0.002 | 3.10E-08 | 423796 | PM2.5     | 30.674      | 0.007                  |                                                     |
| rs12203592  | 6   | 396321    | T             | C            | 0.213 | 0.022  | 0.003 | 6.20E-17 | 423796 | PM2.5     | 69.918      | 0.016                  |                                                     |
| rs77255816  | 6   | 20833602  | T             | C            | 0.037 | 0.031  | 0.006 | 4.20E-08 | 423796 | PM2.5     | 30.041      | 0.007                  | Removed from PM2.5/FA-BMD and PM2.5/FN-BMD analysis |
| rs114708313 | 6   | 31329004  | T             | A            | 0.066 | 0.025  | 0.004 | 4.20E-08 | 423796 | PM2.5     | 30.076      | 0.007                  |                                                     |
| rs77205736  | 8   | 10153460  | T             | C            | 0.274 | 0.014  | 0.002 | 2.10E-08 | 423796 | PM2.5     | 31.399      | 0.007                  |                                                     |
| rs1537371   | 9   | 22099568  | A             | C            | 0.500 | 0.012  | 0.002 | 8.50E-09 | 423796 | PM2.5     | 33.149      | 0.008                  | Removed from PM2.5/FA-BMD and PM2.5/FN-BMD analysis |
| rs72642437  | 18  | 45920421  | T             | C            | 0.004 | 0.113  | 0.019 | 3.10E-09 | 423796 | PM2.5     | 35.119      | 0.008                  |                                                     |
| rs1748399   | 1   | 36655652  | T             | C            | 0.574 | 0.010  | 0.002 | 6.10E-06 | 423796 | PM2.5-10  | 20.461      | 0.005                  |                                                     |
| rs76170056  | 1   | 3592598   | A             | C            | 0.111 | 0.017  | 0.003 | 1.90E-06 | 423796 | PM2.5-10  | 22.736      | 0.005                  | Removed from PM2.5-10/eBMD                          |
| rs71323440  | 3   | 116072052 | T             | C            | 0.115 | 0.016  | 0.003 | 1.70E-06 | 423796 | PM2.5-10  | 22.859      | 0.005                  |                                                     |
| rs9868243   | 3   | 113300863 | C             | T            | 0.195 | 0.012  | 0.003 | 5.70E-06 | 423796 | PM2.5-10  | 20.587      | 0.005                  |                                                     |
| rs74561197  | 4   | 189419188 | A             | G            | 0.318 | -0.010 | 0.002 | 6.80E-06 | 423796 | PM2.5-10  | 20.253      | 0.005                  |                                                     |
| rs13125748  | 4   | 178069165 | A             | C            | 0.258 | 0.011  | 0.003 | 4.70E-06 | 423796 | PM2.5-10  | 20.959      | 0.005                  |                                                     |
| rs9997134   | 4   | 3468969   | C             | T            | 0.399 | -0.010 | 0.002 | 3.40E-06 | 423796 | PM2.5-10  | 21.570      | 0.005                  |                                                     |
| rs138141967 | 4   | 110987693 | T             | G            | 0.015 | -0.043 | 0.009 | 2.70E-06 | 423796 | PM2.5-10  | 21.997      | 0.005                  |                                                     |
| rs116816317 | 4   | 133858337 | A             | G            | 0.020 | 0.038  | 0.008 | 2.30E-06 | 423796 | PM2.5-10  | 22.342      | 0.005                  |                                                     |
| rs116259145 | 5   | 3279667   | A             | C            | 0.032 | 0.030  | 0.006 | 1.10E-06 | 423796 | PM2.5-10  | 23.784      | 0.006                  |                                                     |
| rs72737245  | 5   | 32499805  | G             | A            | 0.233 | -0.012 | 0.003 | 9.10E-06 | 423796 | PM2.5-10  | 19.699      | 0.005                  |                                                     |

|             |    |           |   |   |       |        |       |          |        |          |        |       |                                                                                                                                                |
|-------------|----|-----------|---|---|-------|--------|-------|----------|--------|----------|--------|-------|------------------------------------------------------------------------------------------------------------------------------------------------|
| rs78060907  | 5  | 37945741  | A | C | 0.020 | -0.038 | 0.008 | 7.70E-07 | 423796 | PM2.5-10 | 24.439 | 0.006 | Removed from PM2.5-10/FA-BMD<br>and PM2.5-10/FN-BMD analysis                                                                                   |
| rs62414841  | 6  | 63055986  | T | C | 0.029 | 0.029  | 0.007 | 7.60E-06 | 423796 | PM2.5-10 | 20.025 | 0.005 |                                                                                                                                                |
| rs9497937   | 6  | 148423453 | A | C | 0.232 | -0.013 | 0.003 | 7.20E-07 | 423796 | PM2.5-10 | 24.555 | 0.006 |                                                                                                                                                |
| rs4716063   | 6  | 16381395  | G | A | 0.078 | -0.019 | 0.004 | 5.80E-06 | 423796 | PM2.5-10 | 20.543 | 0.005 |                                                                                                                                                |
| rs17675316  | 7  | 35316123  | G | A | 0.022 | 0.037  | 0.008 | 2.80E-06 | 423796 | PM2.5-10 | 21.932 | 0.005 |                                                                                                                                                |
| rs111308789 | 7  | 13421408  | A | T | 0.057 | -0.022 | 0.005 | 3.50E-06 | 423796 | PM2.5-10 | 21.524 | 0.005 |                                                                                                                                                |
| rs1706918   | 7  | 105272307 | A | G | 0.099 | 0.018  | 0.004 | 6.00E-07 | 423796 | PM2.5-10 | 24.906 | 0.006 |                                                                                                                                                |
| rs57048268  | 7  | 151623218 | C | A | 0.311 | -0.011 | 0.002 | 3.20E-06 | 423796 | PM2.5-10 | 21.705 | 0.005 |                                                                                                                                                |
| rs118101191 | 7  | 111672596 | T | G | 0.010 | 0.060  | 0.011 | 6.50E-08 | 423796 | PM2.5-10 | 29.208 | 0.007 |                                                                                                                                                |
| rs1157546   | 8  | 18777006  | C | T | 0.053 | -0.025 | 0.005 | 5.20E-07 | 423796 | PM2.5-10 | 25.205 | 0.006 |                                                                                                                                                |
| rs10099257  | 8  | 132367285 | T | C | 0.230 | -0.011 | 0.003 | 9.50E-06 | 423796 | PM2.5-10 | 19.618 | 0.005 | Removed from PM2.5-10/FA-BMD<br>and PM2.5-10/FN-BMD analysis<br>Removed from PM2.5-10/FA-BMD,<br>PM2.5-10/eBMD and<br>PM2.5-10/FN-BMD analysis |
| rs7033430   | 9  | 93901159  | G | T | 0.764 | -0.012 | 0.003 | 5.70E-06 | 423796 | PM2.5-10 | 20.581 | 0.005 |                                                                                                                                                |
| rs117389221 | 9  | 133798921 | C | T | 0.017 | -0.040 | 0.009 | 2.20E-06 | 423796 | PM2.5-10 | 22.385 | 0.005 |                                                                                                                                                |
| rs7023300   | 9  | 16238128  | A | T | 0.339 | -0.010 | 0.002 | 9.50E-06 | 423796 | PM2.5-10 | 19.608 | 0.005 |                                                                                                                                                |
| rs79050669  | 12 | 78217999  | T | G | 0.034 | 0.027  | 0.006 | 7.10E-06 | 423796 | PM2.5-10 | 20.178 | 0.005 |                                                                                                                                                |
| rs73220422  | 12 | 117175608 | T | C | 0.028 | 0.029  | 0.007 | 9.60E-06 | 423796 | PM2.5-10 | 19.582 | 0.005 |                                                                                                                                                |
| rs605027    | 12 | 72900322  | T | C | 0.730 | -0.011 | 0.002 | 3.40E-06 | 423796 | PM2.5-10 | 21.564 | 0.005 |                                                                                                                                                |
| rs143921782 | 13 | 39169251  | C | T | 0.010 | 0.050  | 0.011 | 9.00E-06 | 423796 | PM2.5-10 | 19.707 | 0.005 |                                                                                                                                                |
| rs8006373   | 14 | 57123141  | A | T | 0.091 | -0.018 | 0.004 | 3.30E-06 | 423796 | PM2.5-10 | 21.659 | 0.005 |                                                                                                                                                |
| rs11621531  | 14 | 103577789 | A | G | 0.064 | -0.023 | 0.004 | 2.50E-07 | 423796 | PM2.5-10 | 26.565 | 0.006 |                                                                                                                                                |
| rs10152521  | 15 | 40386911  | C | T | 0.003 | 0.114  | 0.023 | 1.00E-06 | 423796 | PM2.5-10 | 23.835 | 0.006 |                                                                                                                                                |

|             |    |           |   |   |       |        |       |          |        |          |         |       |                                                                                |
|-------------|----|-----------|---|---|-------|--------|-------|----------|--------|----------|---------|-------|--------------------------------------------------------------------------------|
| rs74029037  | 15 | 92987146  | T | C | 0.037 | 0.026  | 0.006 | 8.00E-06 | 423796 | PM2.5-10 | 19.940  | 0.005 | Removed from PM2.5-10/FA-BMD,<br>PM2.5-10/eBMD and<br>PM2.5-10/FN-BMD analysis |
| rs8051340   | 16 | 11041413  | G | C | 0.123 | 0.016  | 0.003 | 1.30E-06 | 423796 | PM2.5-10 | 23.356  | 0.006 |                                                                                |
| rs62079137  | 17 | 76358269  | C | T | 0.107 | -0.017 | 0.004 | 3.60E-06 | 423796 | PM2.5-10 | 21.490  | 0.005 |                                                                                |
| rs9956831   | 18 | 74268809  | T | C | 0.014 | -0.042 | 0.009 | 5.50E-06 | 423796 | PM2.5-10 | 20.666  | 0.005 | Removed from PM2.5-10/FA-BMD,<br>PM2.5-10/eBMD and<br>PM2.5-10/FN-BMD analysis |
| rs12462492  | 19 | 22710669  | T | G | 0.257 | -0.012 | 0.002 | 6.90E-07 | 423796 | PM2.5-10 | 24.642  | 0.006 |                                                                                |
| rs117125329 | 19 | 53268990  | G | C | 0.008 | 0.055  | 0.012 | 4.20E-06 | 423796 | PM2.5-10 | 21.162  | 0.005 |                                                                                |
| rs6078746   | 20 | 12737097  | G | A | 0.358 | 0.010  | 0.002 | 5.40E-06 | 423796 | PM2.5-10 | 20.684  | 0.005 | Removed from PM2.5-10/FA-BMD<br>and PM2.5-10/FN-BMD analysis                   |
| rs6063430   | 20 | 48404077  | C | T | 0.331 | -0.011 | 0.002 | 6.40E-06 | 423796 | PM2.5-10 | 20.367  | 0.005 |                                                                                |
| rs4145410   | 22 | 22401006  | G | A | 0.838 | -0.013 | 0.003 | 7.50E-06 | 423796 | PM2.5-10 | 20.060  | 0.005 |                                                                                |
| rs114789974 | 2  | 19498078  | A | C | 0.010 | -0.055 | 0.010 | 1.00E-08 | 455314 | PM10     | 32.832  | 0.007 | Removed from PM10/FN-BMD<br>analysis                                           |
| rs182549    | 2  | 136616754 | T | C | 0.739 | -0.012 | 0.002 | 2.10E-08 | 455314 | PM10     | 31.357  | 0.007 |                                                                                |
| rs13084230  | 3  | 164348898 | T | C | 0.200 | -0.014 | 0.002 | 3.50E-08 | 455314 | PM10     | 30.395  | 0.007 |                                                                                |
| rs6793835   | 3  | 135819934 | A | G | 0.264 | -0.013 | 0.002 | 6.60E-09 | 455314 | PM10     | 33.661  | 0.007 | Removed from PM10/FN-BMD<br>analysis                                           |
| rs56084453  | 3  | 44762830  | G | A | 0.210 | 0.015  | 0.002 | 5.90E-10 | 455314 | PM10     | 38.352  | 0.008 |                                                                                |
| rs4833095   | 4  | 38799710  | C | T | 0.207 | 0.025  | 0.002 | 1.70E-25 | 455314 | PM10     | 108.964 | 0.024 |                                                                                |
| rs13122455  | 4  | 152891564 | T | C | 0.200 | -0.014 | 0.002 | 1.30E-08 | 455314 | PM10     | 32.293  | 0.007 | Removed from PM10/FN-BMD and<br>PM10/eBMD analysis                             |
| rs142169179 | 5  | 120443527 | A | G | 0.020 | 0.040  | 0.007 | 4.40E-08 | 455314 | PM10     | 29.971  | 0.007 |                                                                                |
| rs62370429  | 5  | 101484521 | C | T | 0.058 | -0.026 | 0.004 | 1.80E-09 | 455314 | PM10     | 36.199  | 0.008 |                                                                                |
| rs2248162   | 6  | 29915061  | C | T | 0.640 | 0.012  | 0.002 | 7.80E-09 | 455314 | PM10     | 33.331  | 0.007 | Removed from PM10/FA-BMD and<br>PM10/FN-BMD analysis                           |
| rs9640029   | 7  | 6685123   | T | C | 0.478 | -0.014 | 0.002 | 2.70E-12 | 455314 | PM10     | 48.898  | 0.011 |                                                                                |

|             |    |           |   |   |       |        |       |          |        |      |        |       |                                                                    |
|-------------|----|-----------|---|---|-------|--------|-------|----------|--------|------|--------|-------|--------------------------------------------------------------------|
| rs140295641 | 7  | 145875282 | A | T | 0.027 | -0.035 | 0.006 | 1.30E-08 | 455314 | PM10 | 32.406 | 0.007 | Removed from PM10/FA-BMD,<br>PM10/eBMD and PM10/FN-BMD<br>analysis |
| rs61620752  | 8  | 127488751 | G | T | 0.148 | 0.016  | 0.003 | 6.40E-09 | 455314 | PM10 | 33.720 | 0.007 |                                                                    |
| rs2004679   | 8  | 10135193  | C | T | 0.308 | 0.012  | 0.002 | 2.50E-08 | 455314 | PM10 | 31.049 | 0.007 |                                                                    |
| rs61875074  | 10 | 122622906 | C | A | 0.073 | 0.022  | 0.004 | 6.80E-09 | 455314 | PM10 | 33.600 | 0.007 |                                                                    |
| rs147895162 | 11 | 83717507  | C | T | 0.015 | -0.045 | 0.008 | 3.40E-08 | 455314 | PM10 | 30.481 | 0.007 |                                                                    |
| rs10498638  | 14 | 93934435  | C | T | 0.188 | 0.014  | 0.003 | 3.30E-08 | 455314 | PM10 | 30.513 | 0.007 |                                                                    |
| rs74247887  | 15 | 26213103  | T | C | 0.029 | 0.037  | 0.006 | 2.70E-10 | 455314 | PM10 | 39.870 | 0.009 |                                                                    |
| rs74805019  | 15 | 53081859  | C | G | 0.034 | -0.031 | 0.005 | 2.10E-08 | 455314 | PM10 | 31.386 | 0.007 |                                                                    |
| rs7200852   | 16 | 86157310  | A | C | 0.055 | -0.024 | 0.004 | 4.00E-08 | 455314 | PM10 | 30.129 | 0.007 |                                                                    |
| rs4788565   | 16 | 71892471  | A | G | 0.067 | -0.022 | 0.004 | 4.10E-08 | 455314 | PM10 | 30.111 | 0.007 |                                                                    |
| rs60304336  | 19 | 22794150  | T | G | 0.041 | 0.028  | 0.005 | 2.80E-08 | 455314 | PM10 | 30.842 | 0.007 | Removed from NOx/FA-BMD,<br>NOx/eBMD and NOx/FN-BMD<br>analysis    |
| rs7514956   | 1  | 74019696  | C | A | 0.187 | -0.015 | 0.003 | 3.60E-08 | 456380 | NOx  | 30.341 | 0.007 |                                                                    |
| rs6749467   | 2  | 343517    | A | G | 0.465 | -0.012 | 0.002 | 2.60E-08 | 456380 | NOx  | 30.958 | 0.007 |                                                                    |
| rs1318845   | 4  | 153001662 | C | T | 0.201 | -0.014 | 0.003 | 4.80E-08 | 456380 | NOx  | 29.802 | 0.007 |                                                                    |
| rs72808024  | 5  | 164479164 | C | A | 0.148 | -0.017 | 0.003 | 4.60E-09 | 456380 | NOx  | 34.336 | 0.008 |                                                                    |
| rs77255816  | 6  | 20833602  | T | C | 0.037 | 0.030  | 0.005 | 4.60E-08 | 456380 | NOx  | 29.880 | 0.007 |                                                                    |
| rs12203592  | 6  | 396321    | T | C | 0.219 | 0.019  | 0.002 | 3.20E-15 | 456380 | NOx  | 62.164 | 0.014 |                                                                    |
| rs77205736  | 8  | 10153460  | T | C | 0.275 | 0.013  | 0.002 | 1.00E-08 | 456380 | NOx  | 32.844 | 0.007 |                                                                    |
| rs1217106   | 8  | 64567670  | G | A | 0.782 | 0.015  | 0.003 | 7.50E-09 | 456380 | NOx  | 33.405 | 0.007 |                                                                    |

SNPs: single nucleotide polymorphisms; IVs: instrumental variables; Chr: chromosome; EAF: effect allele frequency; MR: mendelian randomization; SE: standard error of beta; PM: particulate matter; NOx: nitrogen oxides; BMD: bone mineral density; FA: forearm; FN: femoral neck; LS: lumbar spine; eBMD: estimated heel BMD; TB: total body BMD;

Supplementary Table S2. Causal effects of air pollutants on site-specific BMD

| Exposure | Outcome | SNPs<br>(n) | Outcome<br>sample<br>size | IVW          |                   |                           | Weighted Methods |                   |               |                   | MR egger regression |                   |           |       |                   |
|----------|---------|-------------|---------------------------|--------------|-------------------|---------------------------|------------------|-------------------|---------------|-------------------|---------------------|-------------------|-----------|-------|-------------------|
|          |         |             |                           |              |                   |                           | Weighted Median  |                   | Weighted Mode |                   | MR egger            |                   | Intercept |       |                   |
|          |         |             |                           | Beta (SE)    | <i>P</i><br>value | <i>P</i><br>heterogeneity | Beta (SE)        | <i>P</i><br>value | Beta (SE)     | <i>P</i><br>value | Beta (SE)           | <i>P</i><br>value | Intercept | SE    | <i>P</i><br>value |
| PM2.5    | LS-BMD  | 8           | 44731<br>(GEFO)           | 0.07 (0.23)  | 0.764             | 0.592                     | 0.17 (0.30)      | 0.567             | 0.20 (0.38)   | 0.623             | 0.197 (0.435)       | 0.667             | -0.003    | 0.008 | 0.741             |
| PM2.5    | FA-BMD  | 6           | 10805<br>(GEFO)           | 0.21 (0.45)  | 0.638             | 0.991                     | 0.35 (0.53)      | 0.506             | 0.39 (0.62)   | 0.550             | 0.550 (0.891)       | 0.565             | -0.007    | 0.016 | 0.675             |
| PM2.5    | FN-BMD  | 6           | 49988<br>(GEFO)           | -0.27 (0.26) | 0.296             | 0.196                     | -0.00 (0.31)     | 0.750             | 0.01 (0.34)   | 0.980             | 0.325 (0.402)       | 0.465             | -0.013    | 0.008 | 0.153             |
| PM2.5    | eBMD    | 7           | 456824<br>(GEFO)          | -0.46 (0.32) | 0.149             | 1.09E-34                  | -0.18 (0.10)     | 0.065             | -0.09 (0.10)  | 0.390             | -0.443 (0.844)      | 0.622             | 0.000     | 0.013 | 0.986             |
| PM2.5    | TB-BMD  | 8           | 66628<br>(GEFO)           | -0.29 (0.13) | 0.022             | 0.438                     | -0.23 (0.17)     | 0.187             | -0.19 (0.18)  | 0.329             | -0.193 (0.199)      | 0.370             | -0.003    | 0.004 | 0.550             |
| PM2.5-10 | LS-BMD  | 41          | 44731<br>(GEFO)           | 0.07 (0.14)  | 0.154             | 0.971                     | 0.09 (0.19)      | 0.636             | 0.12 (0.36)   | 0.745             | -0.081 (0.317)      | 0.800             | 0.003     | 0.005 | 0.590             |
| PM2.5-10 | FA-BMD  | 35          | 10805<br>(GEFO)           | 0.14 (0.26)  | 0.805             | 0.801                     | 0.06 (0.36)      | 0.875             | -0.17 (0.76)  | 0.830             | 0.191 (0.632)       | 0.764             | -0.001    | 0.009 | 0.929             |
| PM2.5-10 | FN-BMD  | 35          | 49988<br>(GEFO)           | -0.06 (0.13) | 0.661             | 0.913                     | -0.17 (0.17)     | 0.321             | -0.30 (0.35)  | 0.398             | -0.157 (0.290)      | 0.591             | 0.002     | 0.004 | 0.700             |
| PM2.5-10 | eBMD    | 37          | 456824<br>(GEFO)          | -0.03 (0.03) | 0.421             | 0.306                     | -0.07 (0.05)     | 0.126             | -0.18 (0.10)  | 0.253             | 0.006 (0.071)       | 0.937             | -0.001    | 0.001 | 0.629             |
| PM2.5-10 | TB-BMD  | 41          | 66628<br>(GEFO)           | -0.03 (0.09) | 0.728             | 0.290                     | 0.10 (0.14)      | 0.489             | 0.08 (0.16)   | 0.615             | 0.027 (0.163)       | 0.870             | -0.001    | 0.003 | 0.674             |
| PM10     | LS-BMD  | 22          | 44731<br>(GEFO)           | -0.34 (0.16) | 0.605             | 0.040                     | -0.27 (0.24)     | 0.244             | -0.20 (0.35)  | 0.584             | -0.01 (0.44)        | 0.991             | -0.006    | 0.008 | 0.428             |
| PM10     | FA-BMD  | 20          | 10805<br>(GEFO)           | -0.19 (0.31) | 0.594             | 0.742                     | -0.36 (0.44)     | 0.411             | -0.36 (0.67)  | 0.598             | -0.74 (0.82)        | 0.375             | 0.011     | 0.015 | 0.475             |
| PM10     | FN-BMD  | 17          | 49988<br>(GEFO)           | -0.29 (0.17) | 0.088             | 0.987                     | -0.22 (0.22)     | 0.302             | -0.16 (0.35)  | 0.655             | -0.28 (0.43)        | 0.527             | 0.000     | 0.008 | 0.990             |

|      |        |    |                  |              |       |          |              |       |                   |       |                |       |        |       |       |
|------|--------|----|------------------|--------------|-------|----------|--------------|-------|-------------------|-------|----------------|-------|--------|-------|-------|
| PM10 | eBMD   | 20 | 456824<br>(GEFO) | -0.27 (0.14) | 0.046 | 4.73E-45 | -0.06 (0.06) | 0.281 | -0.039<br>(0.073) | 0.602 | 0.391 (0.320)  | 0.238 | -0.012 | 0.006 | 0.038 |
| PM10 | TB-BMD | 22 | 66628<br>(GEFO)  | -0.42 (0.12) | 0.001 | 0.170    | -0.28 (0.16) | 0.079 | -0.169<br>(0.254) | 0.512 | 0.136 (0.313)  | 0.668 | -0.011 | 0.006 | 0.071 |
| NOx  | LS-BMD | 8  | 44731<br>(GEFO)  | -0.38 (0.26) | 0.040 | 0.485    | 0.01 (0.36)  | 0.971 | 0.061 (0.514)     | 0.908 | -1.489 (1.201) | 0.261 | 0.017  | 0.018 | 0.379 |
| NOx  | FA-BMD | 7  | 10805<br>(GEFO)  | -0.14 (0.57) | 0.532 | 0.216    | -0.24 (0.65) | 0.711 | -0.202<br>(0.922) | 0.834 | -0.387 (3.797) | 0.923 | 0.004  | 0.056 | 0.950 |
| NOx  | FN-BMD | 7  | 49988<br>(GEFO)  | -0.71 (0.26) | 0.006 | 0.312    | -0.74 (0.33) | 0.026 | -0.185(0.627)     | 0.099 | -1.218 (0.605) | 0.091 | -0.028 | 0.024 | 0.291 |
| NOx  | eBMD   | 7  | 456824<br>(GEFO) | -0.47 (0.31) | 0.135 | 0.361    | -0.24 (0.10) | 0.013 | -0.271<br>(0.149) | 0.118 | -0.255 (0.096) | 0.875 | -0.003 | 0.023 | 0.893 |
| NOx  | TB-BMD | 8  | 66628<br>(GEFO)  | -0.55 (0.18) | 0.002 | 0.465    | -0.67 (0.23) | 0.004 | -0.828<br>(0.407) | 0.081 | -0.829 (0.851) | 0.367 | 0.004  | 0.013 | 0.752 |

---

SNPs: single nucleotide polymorphisms; IVW: inverse-variance weighted; SE: standard error; PM: particulate matter; NO<sub>x</sub>: nitrogen oxides; BMD: bone mineral density; FA: forearm; FN: femoral neck; LS: lumbar spine; eBMD: estimated heel BMD; TB-BMD: total body BMD; GEFO: Genetic Factors for Osteoporosis Consortium.

Supplementary Table S3. Causal effects of air pollutants on age-specific BMD

| Exposure | Outcome                   | SNPs<br>(n) | Outcome<br>sample<br>size | IVW          |                   |                           | Weighted Methods |                   |               |                   | MR egger regression |                   |           |       |                   |
|----------|---------------------------|-------------|---------------------------|--------------|-------------------|---------------------------|------------------|-------------------|---------------|-------------------|---------------------|-------------------|-----------|-------|-------------------|
|          |                           |             |                           |              |                   |                           | Weighted Median  |                   | Weighted Mode |                   | MR egger            |                   | Intercept |       |                   |
|          |                           |             |                           | Beta (SE)    | <i>P</i><br>value | <i>P</i><br>heterogeneity | Beta (SE)        | <i>P</i><br>value | Beta (SE)     | <i>P</i><br>value | Beta (SE)           | <i>P</i><br>value | Intercept | SE    | <i>P</i><br>value |
| PM2.5    | TB-BMD<br>(age ≤ 15)      | 8           | 11807<br>(GEFO)           | 0.38 (0.25)  | 0.524             | 0.089                     | 0.56 (0.28)      | 0.049             | 0.79 (0.40)   | 0.090             | 0.68 (0.66)         | 0.343             | 0.001     | 0.013 | 0.968             |
| PM2.5    | TB-BMD<br>(15 < age ≤ 30) | 8           | 4180<br>(GEFO)            | 0.42 (0.46)  | 0.367             | 0.455                     | 0.50 (0.56)      | 0.377             | 0.50 (0.56)   | 0.404             | 0.46 (0.69)         | 0.527             | -0.002    | 0.016 | 0.929             |
| PM2.5    | TB-BMD<br>(30 < age ≤ 45) | 8           | 9471<br>(GEFO)            | -0.63 (0.30) | 0.038             | 0.575                     | -0.70 (0.39)     | 0.069             | -0.72 (0.39)  | 0.103             | -0.79 (0.44)        | 0.124             | 0.005     | 0.010 | 0.633             |
| PM2.5    | TB-BMD<br>(45 < age < 60) | 8           | 18735<br>(GEFO)           | -0.28 (0.25) | 0.266             | 0.747                     | -0.34 (0.33)     | 0.311             | -0.32 (0.37)  | 0.411             | -0.14 (0.40)        | 0.739             | -0.004    | 0.008 | 0.676             |
| PM2.5    | TB-BMD<br>(age ≥ 60)      | 8           | 22435<br>(GEFO)           | 0.42 (0.46)  | 0.367             | 0.455                     | 0.50 (0.56)      | 0.375             | 0.50 (0.57)   | 0.468             | 0.46 (0.69)         | 0.527             | -0.002    | 0.016 | 0.929             |
| PM2.5-10 | TB-BMD<br>(age ≤ 15)      | 41          | 11807<br>(GEFO)           | -0.07 (0.18) | 0.703             | 0.503                     | 0.02 (0.31)      | 0.941             | 0.01 (0.28)   | 0.967             | 0.08 (0.30)         | 0.801             | -0.003    | 0.005 | 0.554             |
| PM2.5-10 | TB-BMD<br>(15 < age ≤ 30) | 38          | 4180<br>(GEFO)            | 0.01 (0.33)  | 0.993             | 0.499                     | -0.08 (0.55)     | 0.882             | -0.12 (0.53)  | 0.826             | -0.08 (0.55)        | 0.892             | 0.002     | 0.010 | 0.862             |
| PM2.5-10 | TB-BMD<br>(30 < age ≤ 45) | 41          | 9471<br>(GEFO)            | -0.20 (0.21) | 0.350             | 0.969                     | 0.07 (0.35)      | 0.836             | 0.01 (0.37)   | 0.983             | -0.19 (0.37)        | 0.609             | 0.000     | 0.007 | 0.980             |
| PM2.5-10 | TB-BMD<br>(45 < age < 60) | 41          | 18735<br>(GEFO)           | 0.17 (0.19)  | 0.357             | 0.157                     | 0.17 (0.27)      | 0.536             | 0.17 (0.44)   | 0.695             | -0.05 (0.40)        | 0.905             | 0.004     | 0.006 | 0.534             |
| PM2.5-10 | TB-BMD<br>(age ≥ 60)      | 38          | 22435<br>(GEFO)           | 0.01 (0.33)  | 0.993             | 0.499                     | -0.08 (0.56)     | 0.883             | -0.12 (0.52)  | 0.820             | -0.08 (0.55)        | 0.892             | 0.002     | 0.010 | 0.862             |
| PM10     | TB-BMD<br>(age ≤ 15)      | 22          | 11807<br>(GEFO)           | -0.07 (0.18) | 0.901             | 0.503                     | 0.02 (0.31)      | 0.941             | 0.01 (0.28)   | 0.967             | 0.08 (0.30)         | 0.801             | -0.003    | 0.005 | 0.554             |
| PM10     | TB-BMD<br>(15 < age ≤ 30) | 22          | 4180<br>(GEFO)            | 0.01 (0.33)  | 0.643             | 0.499                     | -0.08 (0.55)     | 0.882             | -0.12 (0.53)  | 0.826             | -0.08 (0.55)        | 0.892             | 0.002     | 0.010 | 0.862             |
| PM10     | TB-BMD<br>(30 < age ≤ 45) | 22          | 9471<br>(GEFO)            | -0.20 (0.21) | 0.114             | 0.969                     | 0.07 (0.35)      | 0.836             | 0.01 (0.37)   | 0.983             | -0.19 (0.37)        | 0.609             | 0.000     | 0.007 | 0.980             |

|      |                           |    |                 |              |       |       |              |       |              |       |              |       |        |        |       |
|------|---------------------------|----|-----------------|--------------|-------|-------|--------------|-------|--------------|-------|--------------|-------|--------|--------|-------|
| PM10 | TB-BMD<br>(45 < age < 60) | 22 | 18735<br>(GEFO) | -0.70 (0.21) | 0.001 | 0.315 | -0.84 (0.30) | 0.005 | -0.84 (0.40) | 0.047 | -0.56 (0.59) | 0.350 | -0.003 | 0.011  | 0.798 |
| PM10 | TB-BMD<br>(age ≥ 60)      | 22 | 22435<br>(GEFO) | -0.21 (0.44) | 0.643 | 0.376 | -0.71 (0.63) | 0.261 | -0.71 (0.86) | 0.417 | 0.46 (1.27)  | 0.723 | -0.013 | 0.023  | 0.582 |
| NOx  | TB-BMD<br>(age ≤ 15)      | 8  | 11807<br>(GEFO) | -0.88 (0.53) | 0.096 | 0.943 | -1.28 (0.55) | 0.019 | -1.55 (0.76) | 0.083 | -1.58 (2.76) | 0.588 | 0.0107 | 0.0415 | 0.805 |
| NOx  | TB-BMD<br>(15 < age ≤ 30) | 8  | 4180<br>(GEFO)  | 0.37 (0.73)  | 0.614 | 0.610 | 0.81 (0.92)  | 0.379 | 0.92 (1.27)  | 0.491 | 1.71 (3.13)  | 0.624 | -0.021 | 0.050  | 0.692 |
| NOx  | TB-BMD<br>(30 < age ≤ 45) | 8  | 9471<br>(GEFO)  | -0.66 (0.47) | 0.158 | 0.695 | -0.56 (0.60) | 0.338 | -0.60 (0.94) | 0.548 | -3.13 (2.10) | 0.186 | 0.038  | 0.032  | 0.272 |
| NOx  | TB-BMD<br>(45 < age < 60) | 8  | 18735<br>(GEFO) | -0.07 (0.43) | 0.864 | 0.100 | 0.14 (0.46)  | 0.763 | 0.44 (0.75)  | 0.577 | 2.44 (1.82)  | 0.229 | -0.039 | 0.028  | 0.207 |
| NOx  | TB-BMD<br>(age ≥ 60)      | 8  | 22435<br>(GEFO) | 0.37 (0.73)  | 0.614 | 0.610 | 0.81 (0.95)  | 0.395 | 0.92 (1.28)  | 0.495 | 1.71 (3.31)  | 0.624 | -0.021 | 0.050  | 0.692 |

---

SNPs: single nucleotide polymorphisms; IVW: inverse-variance weighted; SE: standard error; PM: particulate matter; NO<sub>x</sub>: nitrogen oxides; BMD: bone mineral density; FA: forearm; FN: femoral neck; LS: lumbar spine; eBMD: estimated heel BMD; TB-BMD: total body BMD; GEFO: Genetic Factors for Osteoporosis Consortium.



**Supplementary Table S4. Causal effects of air pollutants on the risk of bone fractures**

| Exposure | Outcome   | SNPs<br>(n) | Outcome<br>sample<br>size | IVW                  |                   |                           | Weighted Methods     |                   |                      |                   | MR egger regression  |                   |           |       |                   |
|----------|-----------|-------------|---------------------------|----------------------|-------------------|---------------------------|----------------------|-------------------|----------------------|-------------------|----------------------|-------------------|-----------|-------|-------------------|
|          |           |             |                           |                      |                   |                           | Weighted Median      |                   | Weighted Mode        |                   | MR egger             |                   | Intercept |       |                   |
|          |           |             |                           | OR (95%CI)           | <i>P</i><br>value | <i>P</i><br>heterogeneity | OR (95%CI)           | <i>P</i><br>value | OR (95%CI)           | <i>P</i><br>value | OR (95%CI)           | <i>P</i><br>value | Intercept | SE    | <i>P</i><br>value |
| PM2.5    | Fractures | 8           | 264973<br>(GEFO)          | 1.46 (0.90,<br>2.36) | 0.126             | 0.079                     | 1.75 (1.00,<br>3.05) | 0.395             | 2.21 (1.00,<br>4.86) | 0.495             | 1.98 (0.54,<br>7.29) | 0.624             | -0.006    | 0.011 | 0.632             |
| PM2.5-10 | Fractures | 41          | 264973<br>(GEFO)          | 0.91 (0.74,<br>1.11) | 0.143             | 0.432                     | 0.98 (0.73,<br>1.30) | 0.862             | 1.08 (0.57,<br>2.03) | 0.822             | 0.54 (0.34,<br>0.84) | 0.010             | 0.009     | 0.004 | 0.014             |
| PM10     | Fractures | 22          | 264973<br>(GEFO)          | 1.19 (0.94,<br>1.50) | 0.350             | 0.833                     | 1.08 (0.78,<br>1.49) | 0.641             | 0.95 (0.55,<br>1.66) | 0.869             | 0.99 (0.55,<br>1.82) | 0.999             | 0.003     | 0.006 | 0.549             |
| NOx      | Fractures | 8           | 264973<br>(GEFO)          | 1.31 (0.82,<br>2.08) | 0.257             | 0.139                     | 1.29 (0.76,<br>2.18) | 0.351             | 1.74 (0.69,<br>4.39) | 0.278             | 1.14 (0.94,<br>2.85) | 0.033             | -0.032    | 0.013 | 0.047             |

SNPs: single nucleotide polymorphisms; IVW: inverse-variance weighted; OR: odds ratio; CI: confidence interval; SE: standard error; PM: particulate matter; NO<sub>x</sub>: nitrogen oxides; BMD: bone mineral density; FA: forearm; FN: femoral neck; LS: lumbar spine; eBMD: estimated heel BMD; TB-BMD: total body BMD; GEFO: Genetic Factors for Osteoporosis Consortium.
